# Supplementary material
Source: PubMed Central journal article supplement (PMC6727974)
Supplement: NIHMS1048581-supplement-SI_with_13_Supplementary_Figs__4_Tables_1_Video.pdf [file NIHMS1048581-supplement-SI_with_13_Supplementary_Figs__4_Tables_1_Video.pdf]

In the format provided by the authors and unedited.

# Atomic structures of enterovirus D68 in complex with two monoclonal antibodies define distinct mechanisms of viral neutralization

Qingbing Zheng<sup>1,6</sup>, Rui Zhu<sup>1,6</sup>, Longfa Xu<sup>1,6</sup>, Maozhou He<sup>1,6</sup>, Xiaodong Yan<sup>1,2,6</sup>, Dongxiao Liu<sup>1</sup>, Zhichao Yin<sup>1</sup>, Yangtao Wu<sup>1</sup>, Yongchao Li<sup>1</sup>, Lisheng Yang<sup>1</sup>, Wangheng Hou<sup>1</sup>, Shuxuan Li<sup>1</sup>, Zizhen Li<sup>1</sup>, Zhenqin Chen<sup>1</sup>, Zhihai Li<sup>1</sup>, Hai Yu<sup>1</sup>, Ying Gu<sup>1</sup>, Jun Zhang<sup>1</sup>, Timothy S. Baker<sup>2,7</sup>, Z. Hong Zhou<sup>3,4,7</sup>, Barney S. Graham<sup>5\*</sup>, Tong Cheng<sup>1\*</sup>, Shaowei Li<sup>1\*</sup> and Ningshao Xia<sup>1\*</sup>

---

<sup>1</sup>State Key Laboratory of Molecular Vaccinology and Molecular Diagnostics, National Institute of Diagnostics and Vaccine Development in Infectious Diseases, School of Life Science, School of Public Health, Xiamen University, Xiamen, China. <sup>2</sup>Department of Chemistry and Biochemistry and Division of Biological Sciences, University of California, San Diego, San Diego, CA, USA. <sup>3</sup>The California NanoSystems Institute, UCLA, Los Angeles, CA, USA. <sup>4</sup>Department of Microbiology, Immunology and Molecular Genetics, University of California, Los Angeles, Los Angeles, CA, USA. <sup>5</sup>Vaccine Research Center, National Institute of Allergy and Infectious Diseases, National Institutes of Health, Bethesda, MD, USA. <sup>6</sup>These authors contributed equally: Qingbing Zheng, Rui Zhu, Longfa Xu, Maozhou He, Xiaodong Yan. <sup>7</sup>These authors jointly supervised this work: Z. Hong Zhou and Timothy S. Baker. \*e-mail: [bgraham@nih.gov](mailto:bgraham@nih.gov); [tcheng@xmu.edu.cn](mailto:tcheng@xmu.edu.cn); [shaowei@xmu.edu.cn](mailto:shaowei@xmu.edu.cn); [nsxia@xmu.edu.cn](mailto:nsxia@xmu.edu.cn)

## Supplementary Information

### Atomic Structures of Enterovirus D68 in Complex with Two Monoclonal Antibodies

#### Define Distinct Mechanisms of Viral Neutralization

Qingbing Zheng<sup>1,6</sup>, Rui Zhu<sup>1,6</sup>, Longfa Xu<sup>1,6</sup>, Maozhou He<sup>1,6</sup>, Xiaodong Yan<sup>1,2,6</sup>, Dongxiao Liu<sup>1</sup>, Zhichao Yin<sup>1</sup>, Yangtao Wu<sup>1</sup>, Yongchao Li<sup>1</sup>, Lisheng Yang<sup>1</sup>, Wangheng Hou<sup>1</sup>, Shuxuan Li<sup>1</sup>, Zizhen Li<sup>1</sup>, Zhenqin Chen<sup>1</sup>, Zhihai Li<sup>1</sup>, Hai Yu<sup>1</sup>, Ying Gu<sup>1</sup>, Jun Zhang<sup>1</sup>, Timothy S. Baker<sup>2</sup>, Z. Hong Zhou<sup>3,4</sup>, Barney S. Graham<sup>5,\*</sup>, Tong Cheng<sup>1,\*</sup>, Shaowei Li<sup>1,\*</sup>, Ningshao Xia<sup>1,\*</sup>

<sup>1</sup>State Key Laboratory of Molecular Vaccinology and Molecular Diagnostics, National Institute of Diagnostics and Vaccine Development in Infectious Diseases, School of Life Science, School of Public Health, Xiamen University, Xiamen, 361102, PR China

<sup>2</sup>Department of Chemistry and Biochemistry and Division of Biological Sciences, University of California, San Diego, San Diego, CA 92093-0378, USA

<sup>3</sup>The California NanoSystems Institute (CNSI), UCLA, Los Angeles, California 90095, USA

<sup>4</sup>Department of Microbiology, Immunology and Molecular Genetics, University of California, Los Angeles, Los Angeles, CA 90095, USA

<sup>5</sup>Vaccine Research Center, National Institute of Allergy and Infectious Diseases, National Institutes of Health, Bethesda, MD 20892, USA

<sup>6</sup>These authors contributed equally to this work.

\*Correspondence should be addressed to N.X. ([nsxia@xmu.edu.cn](mailto:nsxia@xmu.edu.cn)), S.L. ([shaowei@xmu.edu.cn](mailto:shaowei@xmu.edu.cn)), T.C. ([tcheng@xmu.edu.cn](mailto:tcheng@xmu.edu.cn)), or B.S.G. ([bgraham@nih.gov](mailto:bgraham@nih.gov)).

Supervising author should be addressed to Z.H.Z. ([hong.zhou@ucla.edu](mailto:hong.zhou@ucla.edu)) and T.S.B. ([tsb@ucsd.edu](mailto:tsb@ucsd.edu))

30 **Supplementary Figures**

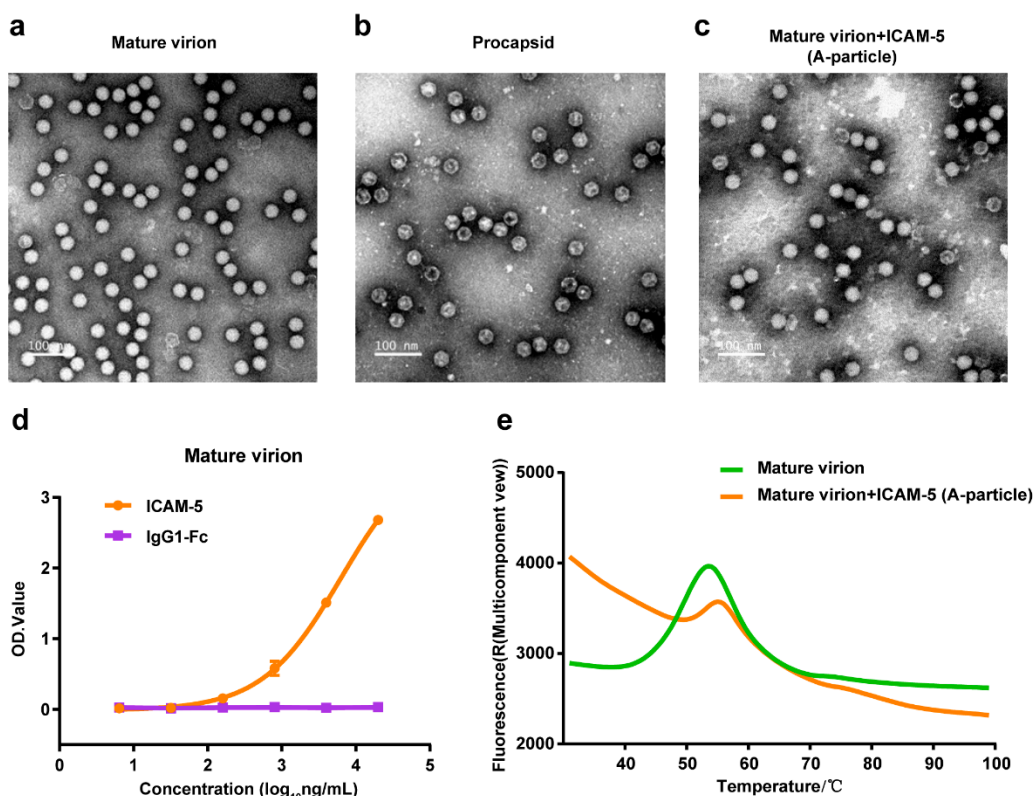

31

32

**Supplementary Figure 1. Characterizations of EV-D68 particles and their complexes with cell receptor ICAM-5.**

33

34 **(a-c)** Negative staining electron microscopy of EV-D68 mature virions **(a)**, procapsids **(b)**  
 35 and A-particles **(c)**. A-particles are those induced by ICAM-5 binding of the purified  
 36 mature virions. Three batches of mature virions, procapsids and ICAM-5 induced A-  
 37 particles were independently prepared and respectively checked with negative staining  
 38 electron microscopy. The particle morphology is consistent within each type, in which  
 39 only one representative micrograph is shown.

40

41 **(d)** Analysis of the binding of ICAM-5 to EV-D68 mature virions by binding ELISA which  
 42 was performed by coating with purified EV-D68 mature virions. Various concentrations of  
 43 ICAM-5 or human IgG1-Fc control proteins were added in triplicate. The amount of bound  
 44 ICAM-5 or control IgG1-Fc are presented as average OD450 ± SD.

44

45 **(e)** PaSTRy assay of EV-D68 mature virions and their complexes with ICAM-5 (A-  
 46 particles). The fluorescence traces are shown for EV-D68 mature virions (green line) as  
 47 well as their complexes with ICAM-5 (orange line). Experiments were repeated in  
 triplicate.

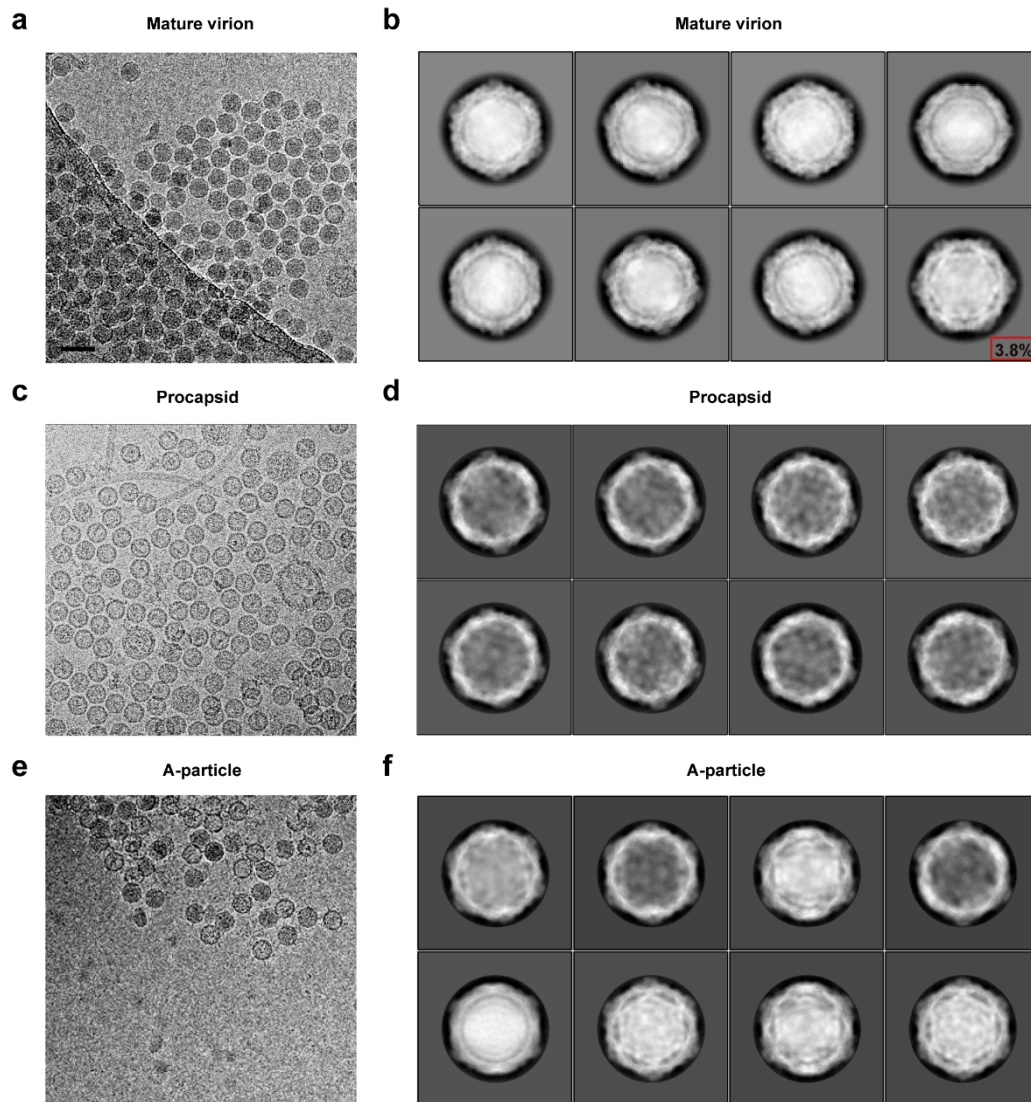

48  
 49 **Supplementary Figure 2. CryoEM micrographs and 2D image processing of three**  
 50 **different types of EV-D68 particles.**  
 51 **(a, c, e)** Representative motion corrected (from 17 movie frames) micrographs of EV-D68  
 52 mature virions **(a)**, procapsids **(c)** and A-particles **(e)**. Scale bar = 50 nm.  
 53 **(b, d, f)** Representative 2D classification averages of above three kinds of particles. Of  
 54 note, a small part of 3.8% of particles were sorted out during image 2D classification of  
 55 mature virions that distinguish to the other particles which were further identified as A-  
 56 particles from virus-infected cells (A-particle\_us). In the sample of A-particle triggered by  
 57 ICAM-5 **(e, f)**, it also contains some parts of mature virions and empty particles.

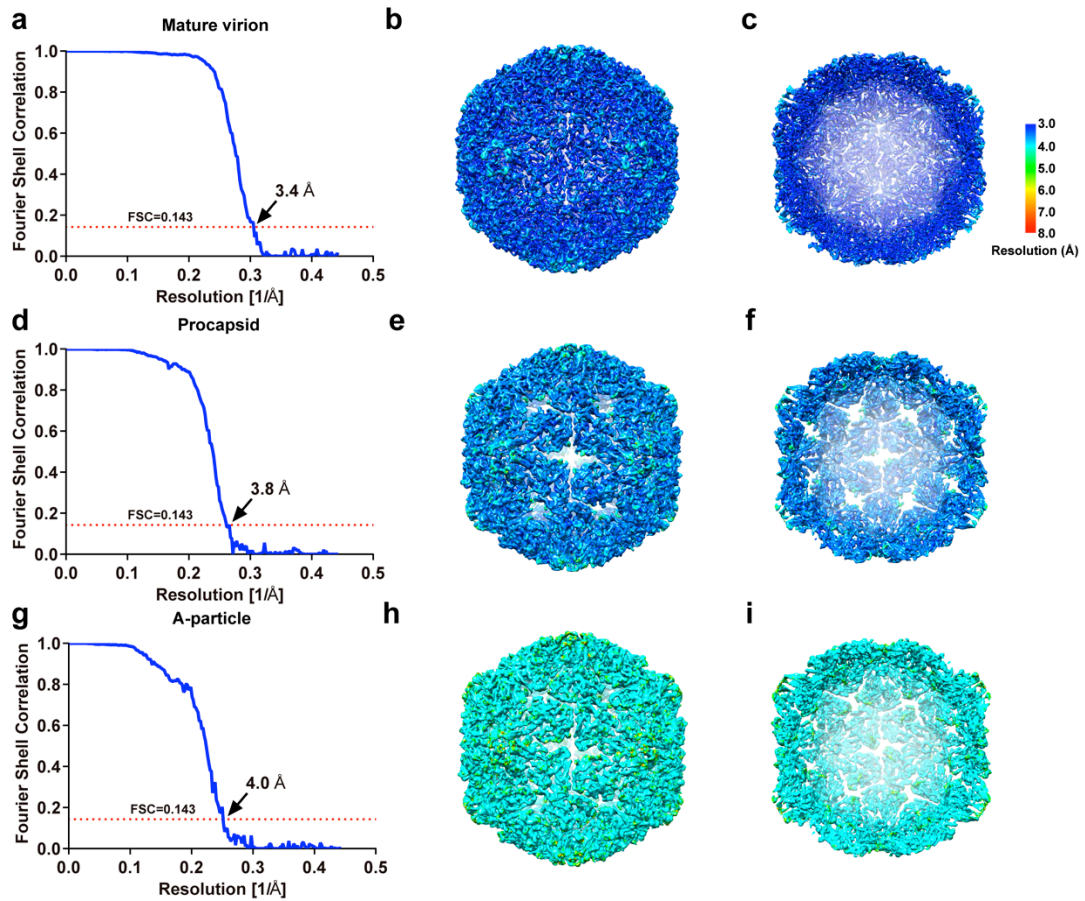

58  
59  
60  
61  
62  
63  
64

**Supplementary Figure 3. Global and local resolution analysis of 3D reconstructions of EV-D68 mature virion, procapsid and A-particle.** (a, d, g) Fourier shell correlation (FSC) curves of 3D reconstructions of EV-D68 mature virion (a), procapsid (d) and A-particle (g) were plotted against spatial frequency. Resmap analysis of the structures of mature virion (b-c), procapsid (e-f) and A-particle (g-h).

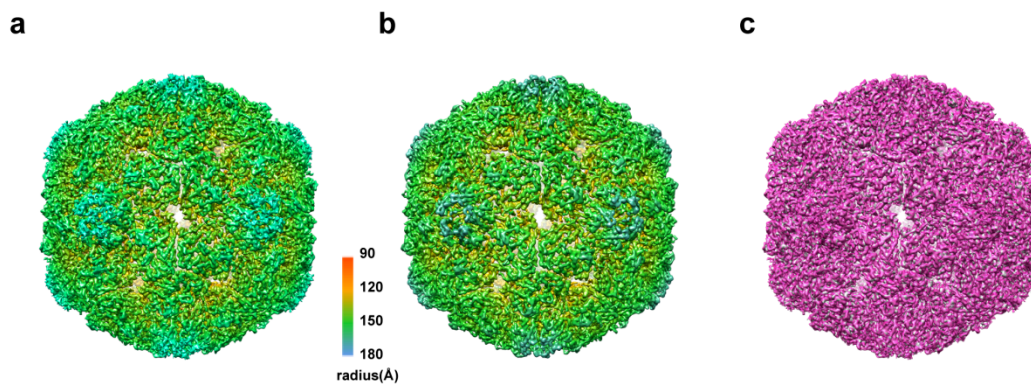

66  
67 **Supplementary Figure 4. The 4.4 Å cryoEM structure of A-particle\_us sorted out**  
68 **from the sample of mature virion.**  
69 **(a, b)** The iso-contoured views of cryoEM maps of A-particle\_us **(a)** and A-particle\_i5 **(b)**  
70 (radially colored) are shown. The density map of A-particle\_us was reconstructed by  
71 sorting a subset of particles distinguished during image processing of the mature virions.  
72 The density map of A-particle\_i5 **(b)** was low-pass filtered to 4.4 Å. **(c)** Comparison of A-  
73 particle\_us (magenta) and A-particle\_i5 (gray) shows highly structural similarity  
74 (correlation coefficient 0.99).

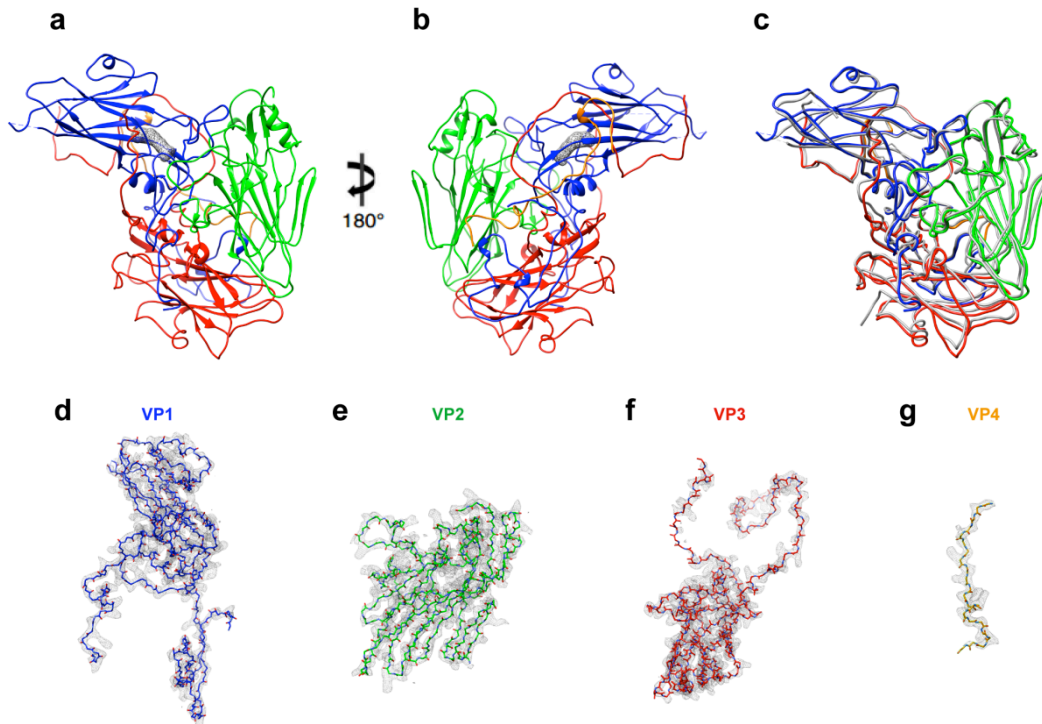

75  
76  
77  
78  
79  
80  
81  
82

**Supplementary Figure 5. Atomic model of the protomer of EV-D68 mature virion.**  
**(a, b)** The model of one protomer of EV-D68 capsid structure contains VP1 (blue), VP2 (green), VP3 (red) and VP4 (orange), the hydrophobic pocket is shown as gray mesh.  
**(c)** Superposition of our structure and the crystal structure of EV-D68 Fermon strain (gray) (PDB code 4wm8).  
**(d-g)** The density maps and fitted models of individual VP1 **(d)**, VP2 **(e)**, VP3 **(f)** and VP4 **(g)**.

## VP1

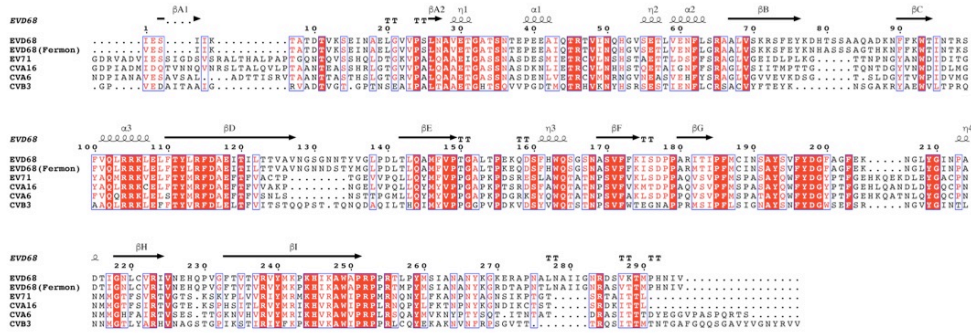

## VP2

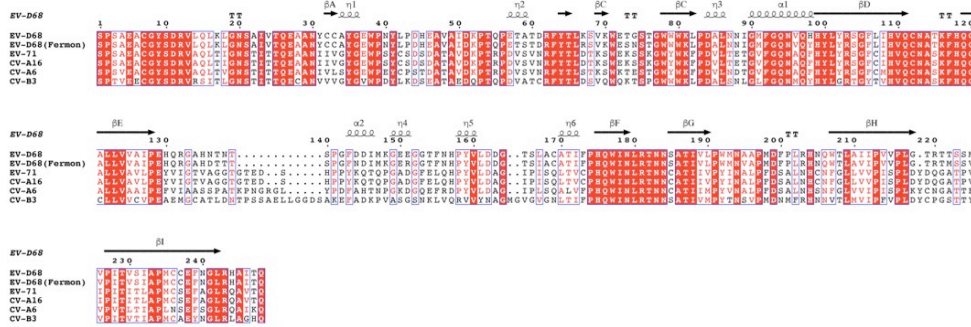

## VP3

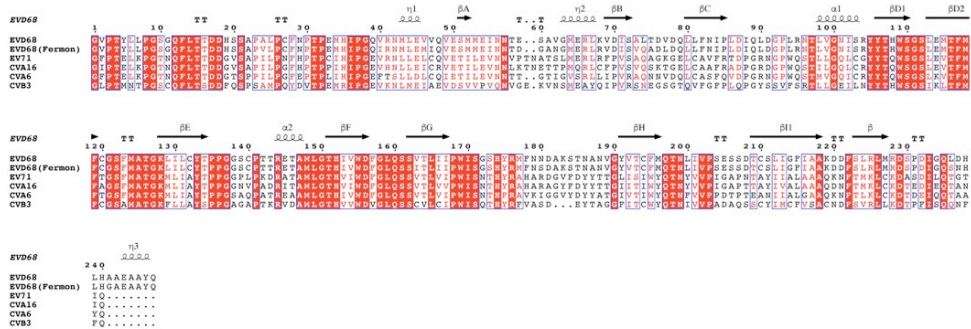

## VP4

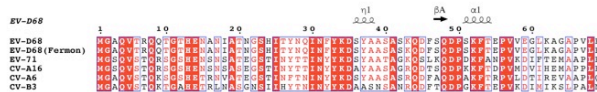

83  
84  
85  
86  
87  
88  
89  
90  
91

### Supplementary Figure 6. Espript representation of a structure-based sequence alignment.

Espript representation of a structure-based sequence alignment of VP1, VP2, VP3 and VP4 of EV-D68 (GenBank accession no. *KM881710*) with EV-D68 Fermon strain (GenBank accession no. *AY426531.1*) and four other representative picornaviruses EV-71, CV-A16, CV-A6 and CV-B3 (GenBank accession no. *FJ600325*, *FJ198212*, *KR706309*, *M88483*, respectively). Secondary structure elements are indicated above the sequence.



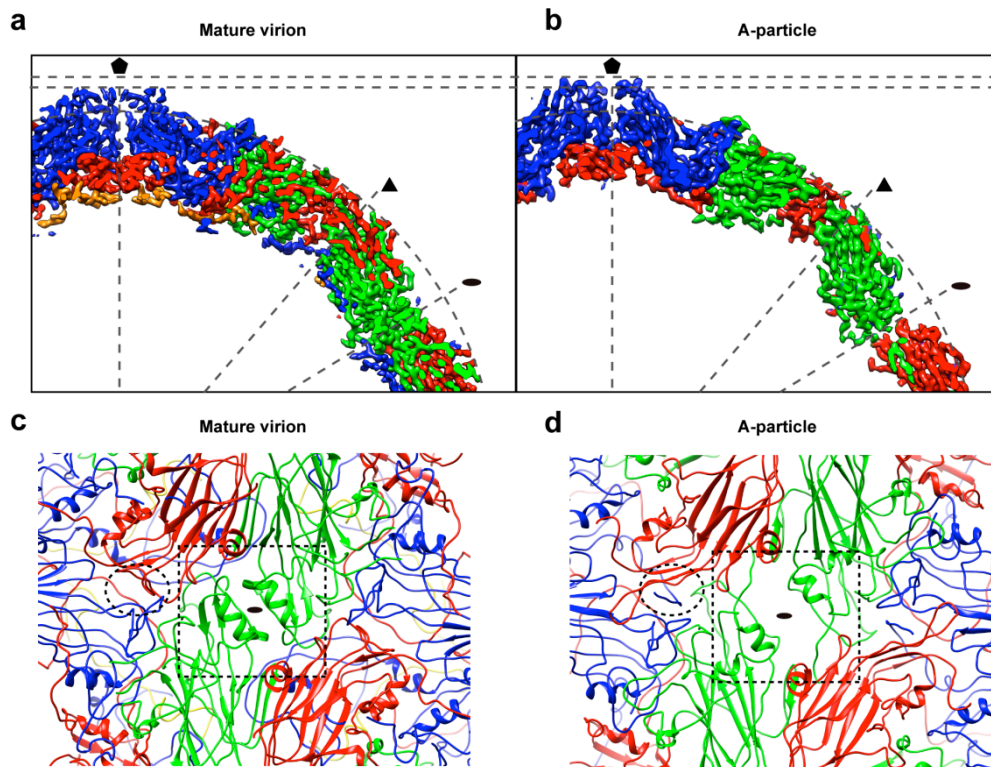

92  
 93  
 94  
 95  
 96  
 97  
 98  
 99  
 100

**Supplementary Figure 7. Structure comparison of EV-D68 mature virion and A-particle.**

**(a, b)** Cross sections of the density maps of EV-D68 mature virion **(a)** and A-particle **(b)** show the latter with a larger radius along 5-fold axis.

**(c, d)** Close up views centered at a 2-fold axis (black ellipses) of atomic models of EV-D68 mature virion **(c)** and A-particle **(d)**. The 2-fold channels (dashed squares) are wider in A-particle than mature virion. An externalized VP1 N-terminus of A-particle in **(d)** is marked by dashed ellipse.

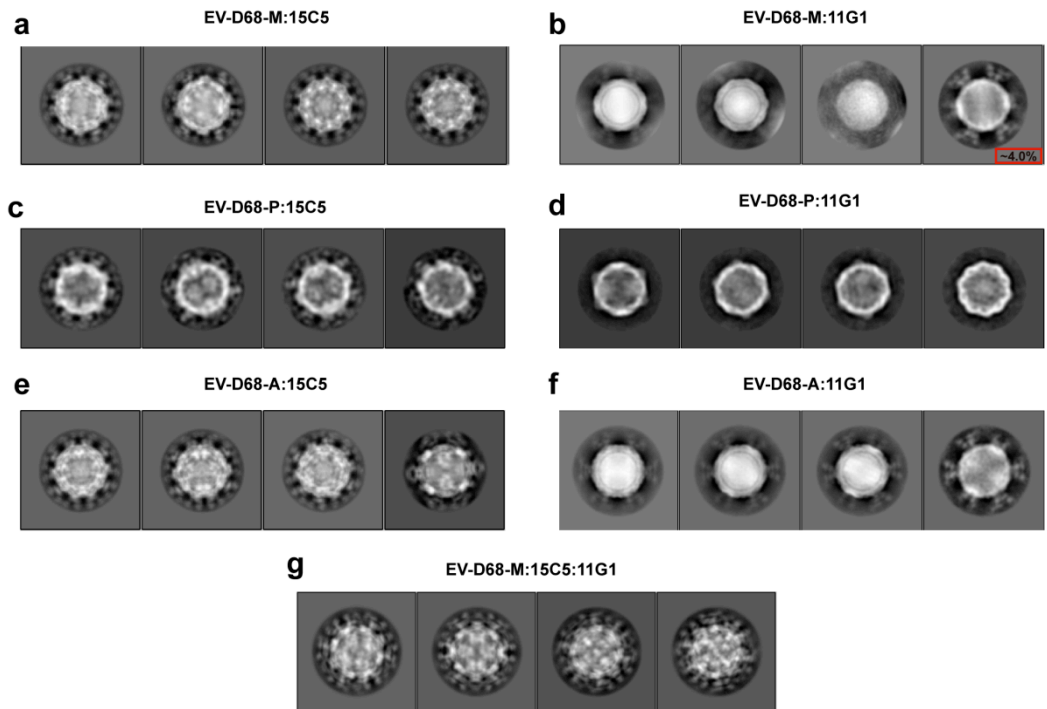

101  
 102  
 103  
 104  
 105  
 106  
 107

**Supplementary Figure 8. 2D classification results of three types of particles in complex with NAb-Fabs.**

**(a-g)** 2D classification results of three types of particles in complex with Fab 15C5 **(a, c, e)**, 11G1 **(b, d, f)** or both **(g)** showing different binding efficiency of two NAbs. Of note, for the sample of EV-D68-M:11G1, only the small part of A-particle\_us (~4%) were efficiently occupied by Fabs.

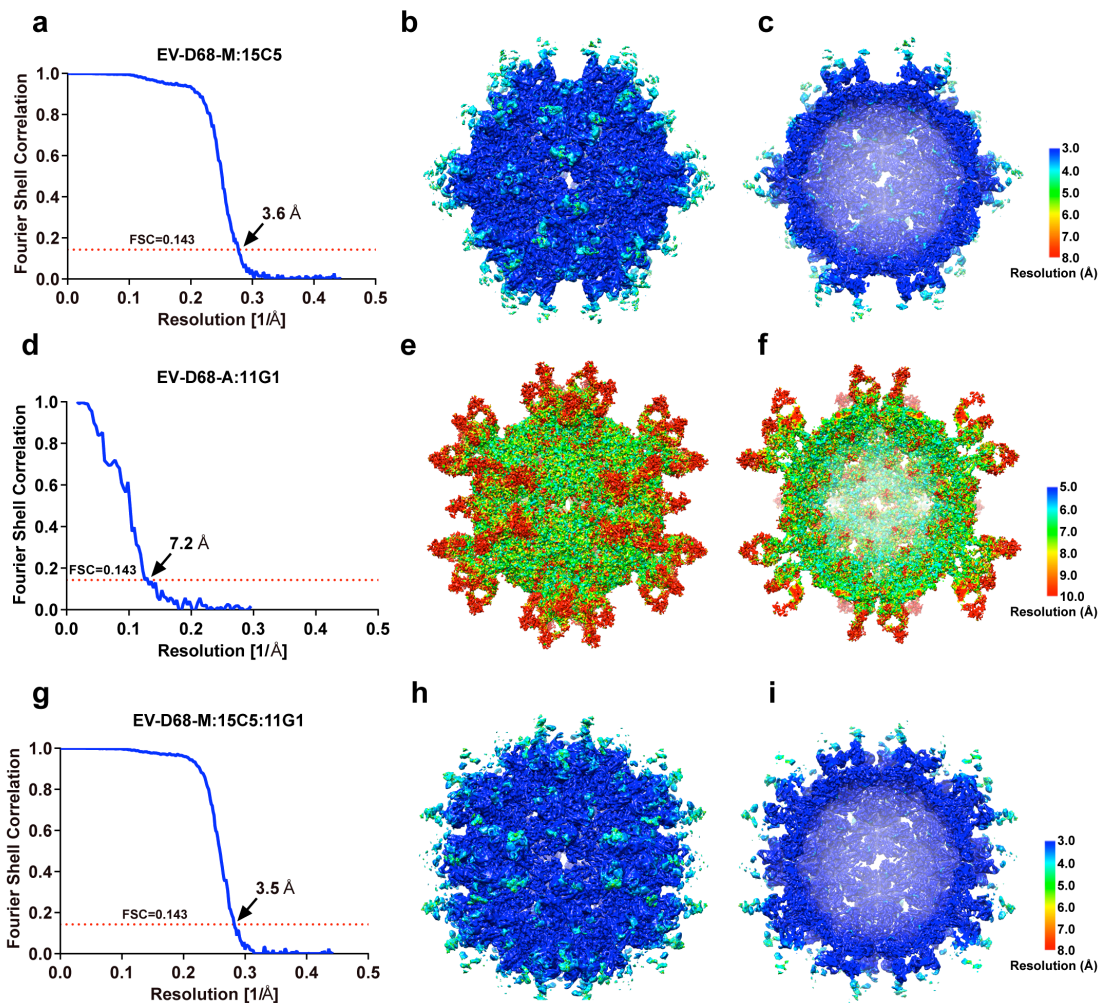

108  
 109  
 110  
 111  
 112  
 113  
 114  
 115

**Supplementary Figure 9. Global and local resolution analysis of 3D reconstructions of EV-D68 immune-complexes.**

(a, d, g) Fourier shell correlation (FSC) curves of 3D reconstructions of EV-D68-M:15C5 (a), EV-D68-A:11G1 (d) and EV-D68-M:15C5:11G1 (g) were plotted against spatial frequency. Resmap analysis of the structures of EV-D68-M:15C5 (b-c), EV-D68-A:11G1 (e-f) and EV-D68-M:15C5:11G1 (h-i).

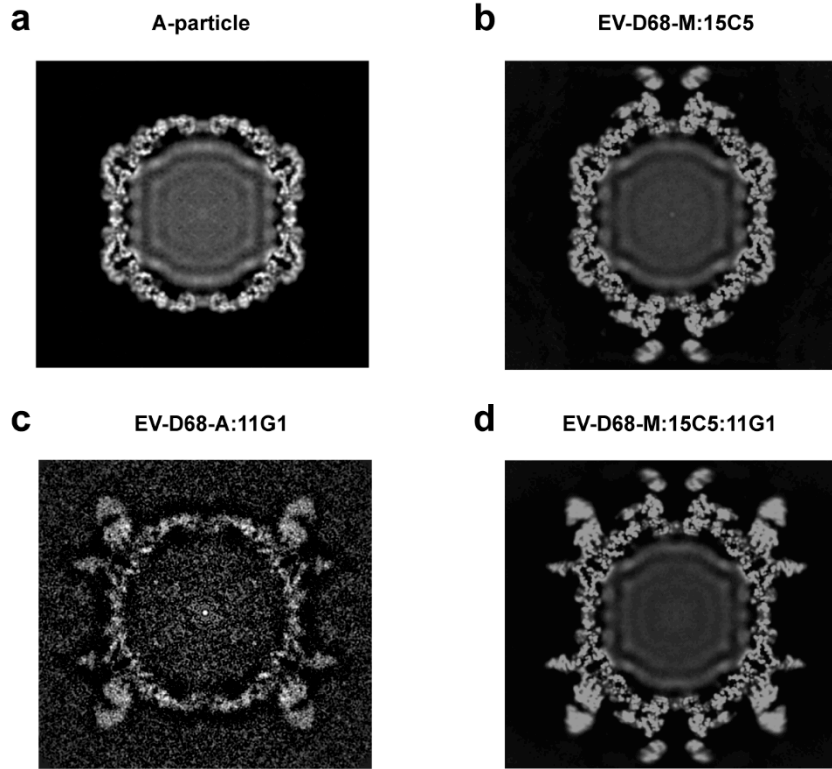

116  
117  
118  
119  
120

**Supplementary Figure 10. Central sections of density maps.**

(a-d) Central sections of density maps of EV-D68 A-particle (a), EV-D68-M:15C5 (b), EV-D68-A:11G1 (c) and EV-D68-M:15C5:11G1 (d). EV-D68 A-particle, EV-D68-M:15C5 and EV-D68-M:15C5:11G1 show similar genomic RNA organization.

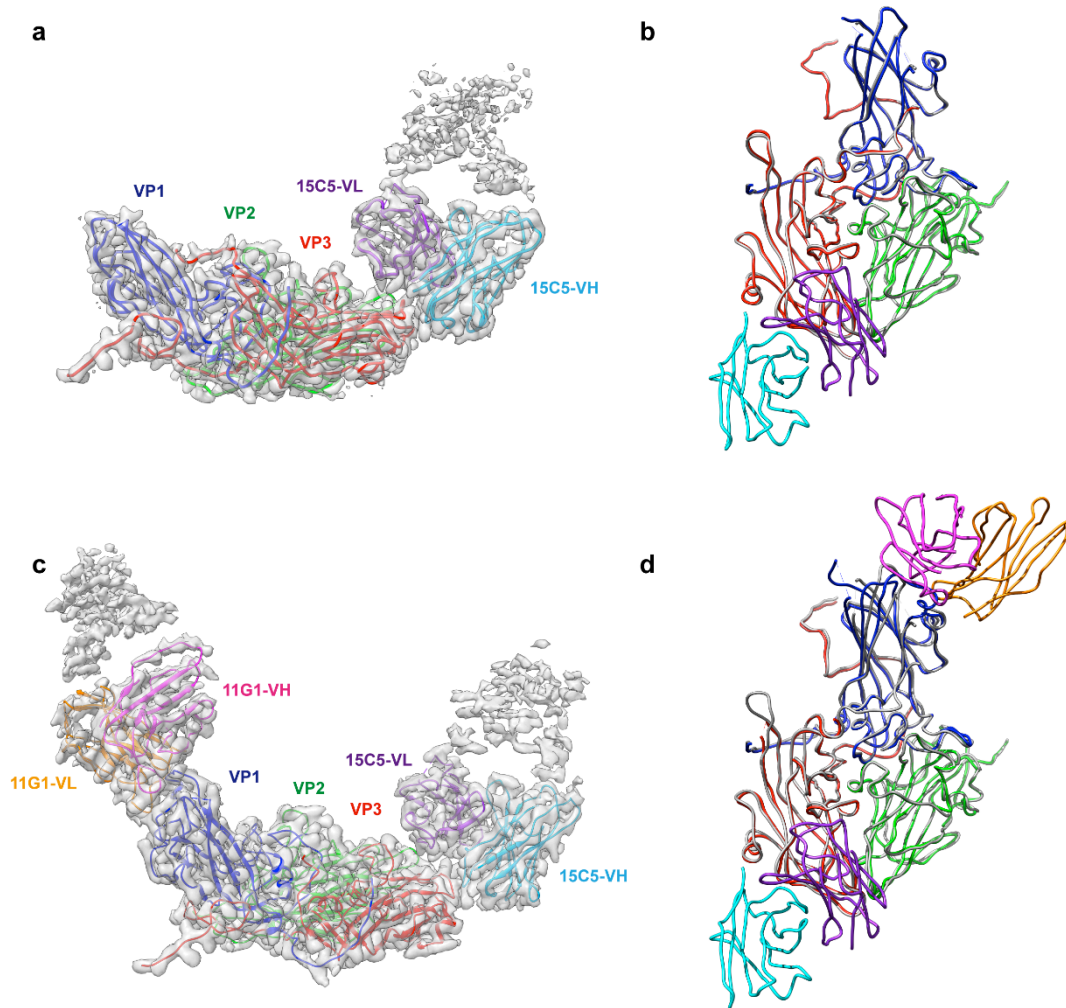

121  
 122  
 123  
 124  
 125  
 126  
 127  
 128  
 129  
 130  
 131  
 132

**Supplementary Figure 11. The segmented asymmetric units of immune-complex density maps fitted with related models.**

**(a, c)** The segmented asymmetric units of EV-D68-M:15C5 **(a)** and EV-D68-M:15C5:11G1 **(c)** immune-complex density maps (gray) fitted with related models (ribbon diagrams). The models of 15C5 heavy chain (15C5-VH), 15C5 light chain (15C5-VL), 11G1 heavy chain (11G1-VH) and 11G1 light chain (11G1-VL) were colored in cyan, purple, magenta and orange respectively. The Fab constant domains of two immune-complexes exhibits weak densities at the contour level of  $3\sigma$ .

**(b, d)** Superpositions of protomers of A-particle (gray) with that of EV-D68-M:15C5 **(b)** or EV-D68-M:15C5:11G1 **(d)**. Models of complexes are colored as the same in **(a)** and **(c)**.

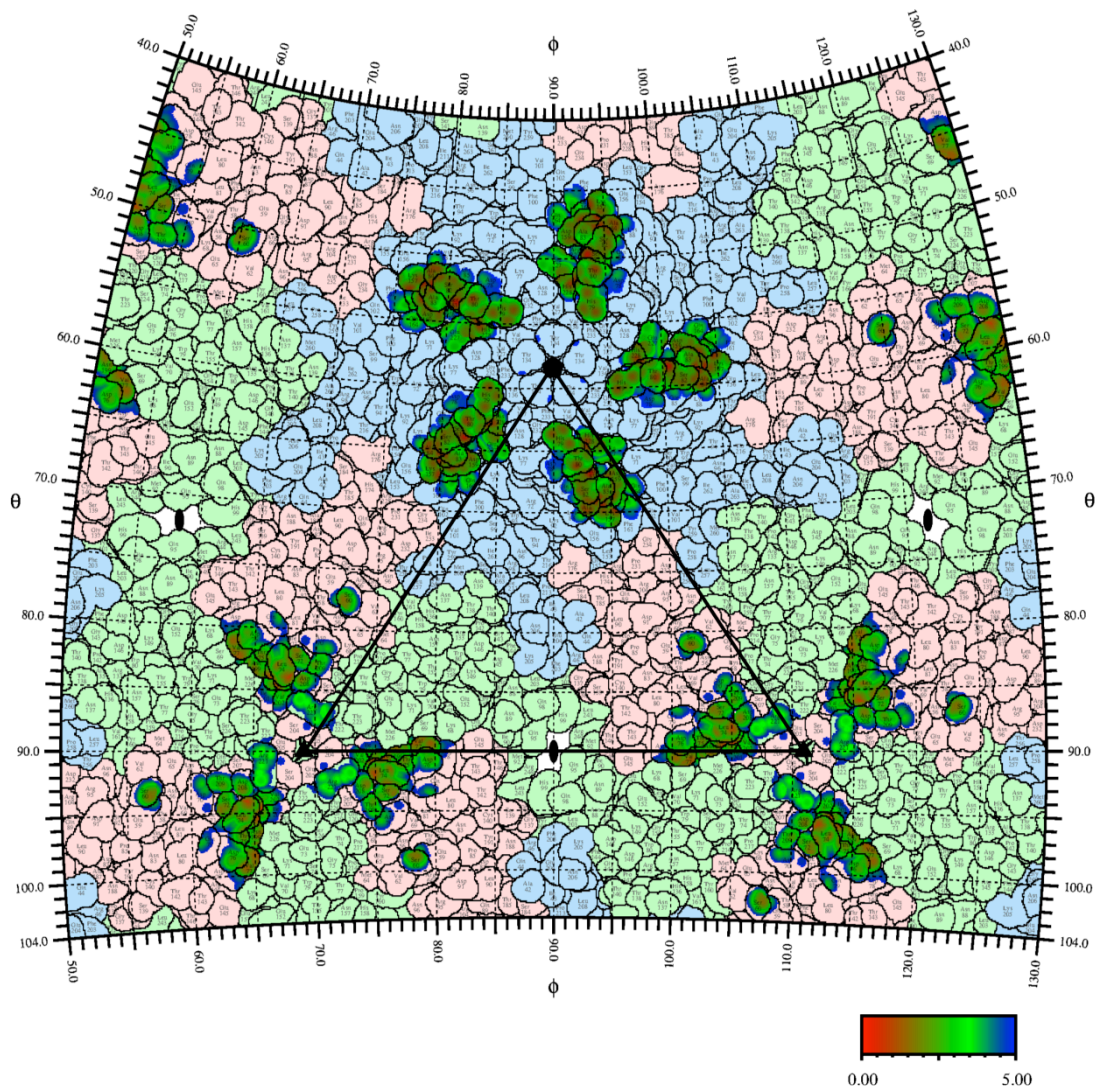

133  
 134  
 135  
 136  
 137  
 138  
 139  
 140  
 141

**Supplementary Figure 12. The footprints of Fab-15C5 and Fab-11G1 on EV-D68 capsid.**

Residues of VP1, VP2 and VP3 are outlined in light blue, light green and light red, respectively. The footprints of Fab-15C5 (around 3-fold) and Fab-11G1 (around 5-fold) are highlighted and colored according to the atomic distance of particle surface to Fab from red to blue. The black triangle shows an icosahedral asymmetric unit of the EV-D68 structure. Figure was prepared with software RIVEM.

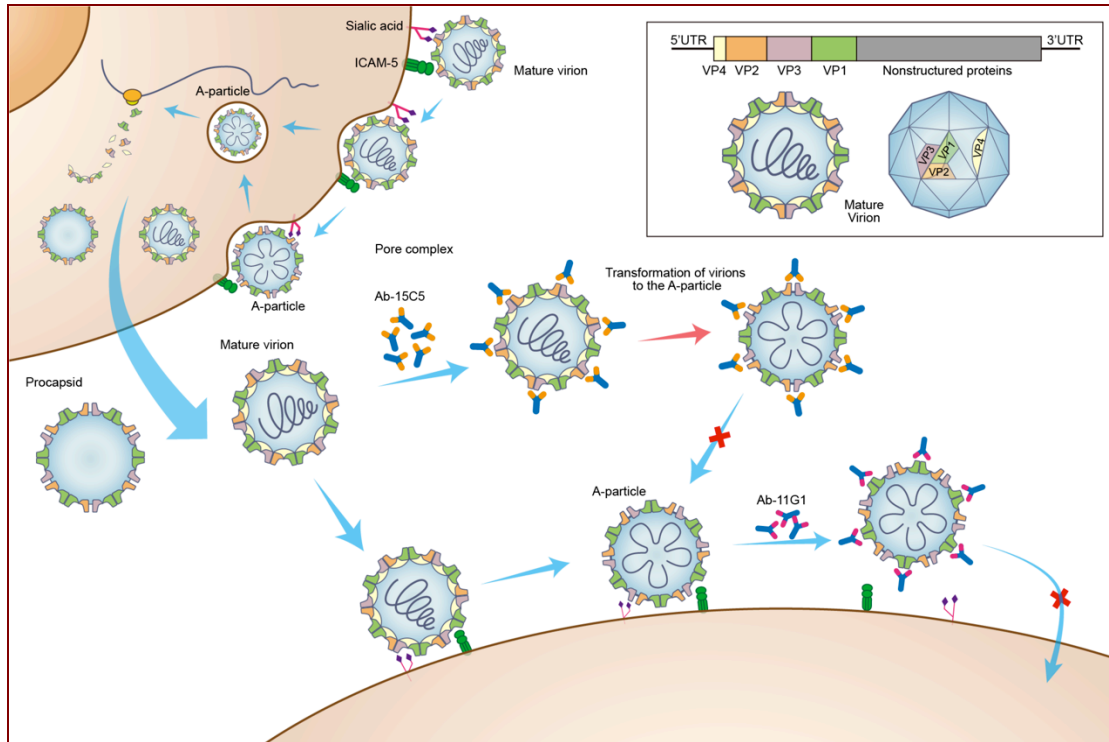

143  
144

**Supplementary Figure 13. Proposed schematic model for EV-D68 life cycle and stages neutralized by 15C5 and 11G1.**

147 Upon binding cellular receptors such as sialic acid or ICAM-5, EV-D68 mature virions  
 148 transform into A-particles within endosomes or on the host cell surface prior to  
 149 endocytosis. A-particles then undergo uncoating and release genomic RNA into cytosol.  
 150 Progeny mature virions and procapsids without genomes are released from infected cell.  
 151 NAb 15C5 can bind all three forms of particles. It can trigger the transformation of mature  
 152 virions to A-particles and neutralize virus pre-attachment. In contrast, NAb 11G1  
 153 exclusively recognizes A-particles, and it appears to recognize viruses only after their  
 154 attaching to cell surface receptors and subsequently undergoing transformation to A-  
 155 particles. Therefore, NAb 11G1 may neutralize virus via a post-attachment manner.

156  
157**Supplementary Tables****Supplementary Table 1. Statistics of 3D reconstructions and model refinement.**

|                                                     | Mature virion(EV-D68-M) (EMDB-9629) (PDB 6AJ0) | Procapsid (EV-D68-P) (EMDB-9632) (PDB 6AJ3) | A-particle_5 (EMDB-9631) (PDB 6AJ2) | A-particle_us (EMDB-9635) | EV-D68-M:15C5 (EMDB-9633) (PDB 6AJ7) | EV-D68-M:15C5:1G1 (EMDB-9634) (PDB 6AJ9) | EV-D68-A:11G1 (EMDB-9636) |
|-----------------------------------------------------|------------------------------------------------|---------------------------------------------|-------------------------------------|---------------------------|--------------------------------------|------------------------------------------|---------------------------|
| <b>Data collection and processing</b>               |                                                |                                             |                                     |                           |                                      |                                          |                           |
| Magnification                                       | x93,000                                        | x93,000                                     | x93,000                             | x93,000                   | x93,000                              | x93,000                                  | x93,000                   |
| Voltage (kV)                                        | 300                                            | 300                                         | 300                                 | 300                       | 300                                  | 300                                      | 300                       |
| Electron exposure (e <sup>-</sup> /Å <sup>2</sup> ) | 25                                             | 25                                          | 25                                  | 25                        | 25                                   | 25                                       | 25                        |
| Defocus range (µm)                                  | -0.7 to -2.8                                   | -0.9 to -3.6                                | -0.8 to -3.8                        | -0.7 to -2.8              | -0.7 to -4.1                         | -1.0 to -4.5                             | -1.7 to -4.2              |
| Pixel size (Å)                                      | 1.128                                          | 1.128                                       | 1.128                               | 1.128                     | 1.128                                | 1.128                                    | 1.128                     |
| Symmetry imposed                                    | I2                                             | I2                                          | I2                                  | I2                        | I2                                   | I2                                       | I2                        |
| Initial particle images (no.)                       | 45,822                                         | 14,265                                      | 25,045                              | 45,822                    | 105,346                              | 143,304                                  | 414                       |
| Final particle images (no.)                         | 11,938                                         | 13,849                                      | 9,625                               | 2,491                     | 58,540                               | 102,512                                  | 375                       |
| Map resolution (Å)                                  | 3.4                                            | 3.8                                         | 4.0                                 | 4.4                       | 3.6                                  | 3.5                                      | 7.2                       |
| FSC threshold                                       | 0.143                                          | 0.143                                       | 0.143                               | 0.143                     | 0.143                                | 0.143                                    | 0.143                     |
| Map resolution range (Å)                            | 3.0-8.0                                        | 3.0-8.0                                     | 3.0-8.0                             | n/a                       | 3.0-8.0                              | 3.0-8.0                                  | 5.0-10.0                  |
| <b>Refinement</b>                                   |                                                |                                             |                                     |                           |                                      |                                          |                           |
| Initial model used (PDB code)                       | 4wm8                                           | 5xs4                                        | 5xs4                                | n/a                       | 5xs7                                 | 5xs7                                     | n/a                       |
| Model resolution (Å)                                | 3.5                                            | 4.1                                         | 4.2                                 | n/a                       | 3.6                                  | 3.6                                      | n/a                       |
| FSC threshold                                       | 0.5                                            | 0.5                                         | 0.5                                 |                           | 0.5                                  | 0.5                                      |                           |
| Model resolution range (Å)                          | 3.5                                            | 4.1                                         | 4.2                                 |                           | 3.6                                  | 3.6                                      |                           |
| Map sharpening <i>B</i> factor (Å <sup>2</sup> )    | -206.37                                        | -238.06                                     | -222.19                             | -252.26                   | -230.01                              | -237.26                                  | n/a                       |
| Model composition                                   |                                                |                                             |                                     | n/a                       |                                      |                                          | n/a                       |
| Non-hydrogen atoms                                  | 6,163                                          | 4,487                                       | 5,355                               |                           | 7,055                                | 8,694                                    |                           |
| Protein residues                                    | 789                                            | 573                                         | 682                                 |                           | 901                                  | 1,112                                    |                           |
| Ligands                                             | 1                                              | 0                                           | 0                                   |                           | 0                                    | 0                                        |                           |
| <i>B</i> factors (Å <sup>2</sup> )                  | n/a                                            | n/a                                         | n/a                                 | n/a                       | n/a                                  | n/a                                      | n/a                       |
| Protein                                             |                                                |                                             |                                     |                           |                                      |                                          |                           |
| Ligand                                              |                                                |                                             |                                     |                           |                                      |                                          |                           |
| R.m.s. deviations                                   |                                                |                                             |                                     | n/a                       |                                      |                                          | n/a                       |
| Bond lengths (Å)                                    | 0.0095                                         | 0.0081                                      | 0.0052                              |                           | 0.0083                               | 0.0073                                   |                           |
| Bond angles (°)                                     | 1.25                                           | 1.23                                        | 1.21                                |                           | 1.3                                  | 1.25                                     |                           |
| Validation                                          |                                                |                                             |                                     | n/a                       |                                      |                                          | n/a                       |
| MolProbity score                                    | 1.46                                           | 1.60                                        | 1.60                                |                           | 1.68                                 | 1.57                                     |                           |
| Clashscore                                          | 3.03                                           | 4.83                                        | 3.12                                |                           | 4.03                                 | 2.8                                      |                           |
| Poor rotamers (%)                                   | 0.00                                           | 0.00                                        | 0.00                                |                           | 0.00                                 | 0.00                                     |                           |
| Ramachandran plot                                   |                                                |                                             |                                     | n/a                       |                                      |                                          | n/a                       |
| Favored (%)                                         | 94.98                                          | 94.97                                       | 91.82                               |                           | 91.86                                | 92.21                                    |                           |
| Allowed (%)                                         | 4.89                                           | 5.03                                        | 8.18                                |                           | 8.14                                 | 7.79                                     |                           |
| Disallowed (%)                                      | 0.13                                           | 0.00                                        | 0.00                                |                           | 0.00                                 | 0.00                                     |                           |

158



159  
160  
161

**Supplementary Table 2. Structural comparison (RMSD) of capsid proteins of EV-D68 in different particle forms.**

| <b>Particle forms</b>                                  | <b>RMSD</b>    | <b>VP1</b> | <b>VP2</b> | <b>VP3</b> | <b>VP4</b> | <b>Total</b> |
|--------------------------------------------------------|----------------|------------|------------|------------|------------|--------------|
| protomer of mature VS<br>Fermon (crystal<br>structure) | a.a.<br>number | 271        | 235        | 247        | 32         | <b>785</b>   |
|                                                        | RMSD           | 0.97       | 1.03       | 1.20       | 1.20       | <b>1.07</b>  |
| protomer of A-particle<br>VS procapsid                 | a.a.<br>number | 186        | 166        | 220        | /          | <b>572</b>   |
|                                                        | RMSD           | 0.93       | 0.61       | 0.64       | /          | <b>0.73</b>  |
| protomer of A-particle<br>VS 15C5 complex              | a.a.<br>number | 204        | 232        | 246        | /          | <b>682</b>   |
|                                                        | RMSD           | 0.60       | 0.44       | 0.44       | /          | <b>0.49</b>  |
| protomer of A-particle<br>VS triple immune-<br>complex | a.a.<br>number | 204        | 232        | 227        | /          | <b>663</b>   |
|                                                        | RMSD           | 1.07       | 0.56       | 0.85       | /          | <b>0.82</b>  |

162 **Supplementary Table 3. Interaction contacts of 15C5 revealed by immune-**  
 163 **complexes.**

| EV-D68-M:15C5 interaction residues |          |              |           |            |       |
|------------------------------------|----------|--------------|-----------|------------|-------|
| domains                            | residues | distance (Å) | Fab-15C5  | CDR        |       |
| VP3                                | AB loop  | S60 [OG]     | 3.29      | S60 [OG]   | LFR2  |
|                                    |          | S72 [OG]     | 3.29      | Y49 [OH]   | LCDR2 |
|                                    | BC loop  | L74 [CD1]    | 3.34      | S106 [OG]  | HCDR3 |
|                                    |          | L74 [CD2]    | 3.40      | Y104 [CG]  | HCDR3 |
|                                    |          | L74 [CD2]    | 3.30      | Y104 [CD2] | HCDR3 |
|                                    |          | D76 [OD1]    | 3.15      | Y32 [OH]   | HCDR1 |
|                                    |          | D76 [OD1]    | 3.30      | Y32 [CE1]  | HCDR1 |
|                                    |          | D76 [OD1]    | 3.83      | R98 [NH1]  | HCDR3 |
|                                    | HI loop  | N199 [ND2]   | 3.42      | G102 [N]   | HCDR3 |
|                                    |          | D208 [OD2]   | 3.79      | S50 [OG]   | LCDR2 |
| VP2*                               | BC loop  | K67 [NZ]     | 3.83      | T28 [OG1]  | HCDR1 |
|                                    |          | K70 [NZ]     | 2.55      | N31 [O]    | HCDR1 |
|                                    |          | K70 [NZ]     | 2.85      | F101 [O]   | HCDR3 |
|                                    |          | K70 [NZ]     | 2.98      | N103 [ND2] | HCDR3 |
|                                    |          | K70 [CE]     | 3.11      | F101 [O]   | HCDR3 |
|                                    |          | E72 [OE1]    | 2.61      | N52 [ND2]  | HCDR2 |
|                                    | S75 [OG] | 3.86         | N54 [ND2] | HCDR2      |       |
|                                    | HI loop  | S224 [O]     | 3.44      | N103 [CG]  | HCDR3 |
|                                    |          | S224 [O]     | 2.41      | N103 [OD1] | HCDR3 |
|                                    |          | S224 [CB]    | 3.48      | N103 [OD1] | HCDR3 |
| M225 [SD]                          |          | 3.36         | G102 [CA] | HCDR3      |       |

164  
 165 The interaction residues were computed using the PISA server  
 166 ([http://www.ebi.ac.uk/msd-srv/prot\\_int/pistart.html](http://www.ebi.ac.uk/msd-srv/prot_int/pistart.html)). Hydrogen-bond distances cut-off: 4.0  
 167 Å; salt-bridge distance cut-off: 4.0 Å. The red fonts refer to hydrogen bonds and the  
 168 green background refers to salt-bridge.  
 169 \* refers to viral domains from adjacent protomer.

170  
171

**Supplementary Table 4. Interaction contacts of 11G1 revealed by immune-complexes.**

| EV-D68-M:11G1 interaction residues |            |              |            |           |       |
|------------------------------------|------------|--------------|------------|-----------|-------|
| domains                            | residues   | distance (Å) | Fab-11G1   | CDR       |       |
| VP1                                | T80 [CA]   | 3.48         | G104 [O]   | HCDR3     |       |
|                                    | T80 [OG1]  | 3.82         | G104 [O]   | HCDR3     |       |
|                                    | T80 [OG1]  | 3.08         | S106 [OG]  | HCDR3     |       |
|                                    | S81 [N]    | 2.88         | G104 [O]   | HCDR3     |       |
|                                    | S81 [OG]   | 3.49         | G104 [O]   | HCDR3     |       |
|                                    | S81 [O]    | 3.47         | G104 [O]   | HCDR3     |       |
|                                    | S81 [O]    | 3.45         | S106 [CB]  | HCDR3     |       |
|                                    | S81 [O]    | 3.15         | S106 [N]   | HCDR3     |       |
|                                    | S81 [O]    | 2.54         | S106 [OG]  | HCDR3     |       |
|                                    | S81 [C]    | 3.33         | S106 [OG]  | HCDR3     |       |
|                                    | S82 [OG]   | 2.78         | Y98 [O]    | LCDR3     |       |
|                                    | S82 [OG]   | 3.58         | Y100 [N]   | LCDR3     |       |
|                                    | BC loop    | S82 [OG]     | 3.32       | N99 [CA]  | LCDR3 |
|                                    |            | A83 [O]      | 3.18       | Y31 [CD1] | LCDR1 |
|                                    |            | A83 [O]      | 3.22       | Y31 [CE1] | LCDR1 |
|                                    |            | A83 [O]      | 3.35       | Y98 [CE1] | LCDR3 |
|                                    |            | A83 [N]      | 3.37       | Y98 [O]   | LCDR3 |
|                                    |            | A83 [C]      | 3.40       | Y98 [O]   | LCDR3 |
|                                    |            | A84 [CB]     | 3.49       | Y98 [O]   | LCDR3 |
|                                    |            | A84 [N]      | 3.05       | Y98 [O]   | LCDR3 |
|                                    |            | D87 [OD1]    | 3.41       | S32 [CB]  | LCDR1 |
|                                    |            | D87 [OD1]    | 3.21       | S32 [OG]  | LCDR1 |
|                                    |            | D87 [OD2]    | 3.00       | S32 [OG]  | LCDR1 |
|                                    |            | D87 [OD2]    | 3.39       | S32 [N]   | LCDR1 |
|                                    |            | D87 [OD2]    | 2.97       | Y98 [OH]  | LCDR3 |
|                                    |            | K157 [NZ]    | 3.25       | L30 [O]   | LCDR1 |
|                                    | EF loop    | K157 [CD]    | 3.23       | S32OG]    | LCDR1 |
|                                    |            | D159 [O]     | 2.75       | S32 [CB]  | LCDR1 |
|                                    |            | 3.30         | S32 [OG]   | LCDR1     |       |
| HI loop                            | H228 [O]   | 3.22         | Y103 [O]   | HCDR3     |       |
|                                    | Q229 [CB]  | 3.39         | Y103 [O]   | HCDR3     |       |
| β strand                           | E75 [OE1]  | 3.46         | Y103 [OH]  | HCDR3     |       |
|                                    | K77 [NZ]   | 3.35         | Y102 [CD1] | HCDR3     |       |
| VP1*                               | V127 [O]   | 3.49         | Y103 [CD1] | HCDR3     |       |
| DE loop                            | N128 [CB]  | 3.50         | Y102 [O]   | HCDR3     |       |
|                                    | N128 [CG]  | 3.36         | Y102 [O]   | HCDR3     |       |
|                                    | N128 [ND2] | 3.26         | Y102 [O]   | HCDR3     |       |
| β strand                           | T234 [OG1] | 3.7          | Y103 [OH]  | HCDR3     |       |

172  
173  
174  
175  
176

The interaction residues were computed using the PISA server ([http://www.ebi.ac.uk/msd-srv/prot\\_int/pistart.html](http://www.ebi.ac.uk/msd-srv/prot_int/pistart.html)). Hydrogen-bond distance cut-off: 4.0 Å; The red fonts refer to hydrogen bonds.

\* refers to viral domains from adjacent protomer.

177 **Supplementary Video 1**  
178 **Conformational changes of a protomer when EV-D68 mature virion transforms**  
179 **(triggered by ICAM-5) into A-particle.** The protomer rotates counterclockwise by about  $3.5^\circ$   
180 with the pivot point located at the corner of VP3. The pocket-factor binding region is  
181 collapsed, the VP1 N-terminal is externalized and the VP4 is lost during such transition.
